# Supplementary material for: Metformin inhibits gastric cancer cell proliferation by regulation of a novel Loc100506691-CHAC1 axis
Source: PubMed Central journal article supplement — Mol Ther Oncolytics. 2021 Aug 19;22:180–94. doi: 10.1016/j.omto.2021.08.006 (PMC8416970; doi:10.1016/j.omto.2021.08.006), 2021-08-19
Supplement: mmc1.pdf [file mmc1.pdf]

**OMTO, Volume 22**

**Supplemental information**

**Metformin inhibits gastric cancer cell**

**proliferation by regulation of a novel**

**Loc100506691-CHAC1 axis**

**Hui-Hwa Tseng, You-Zuo Chen, Nan-Hua Chou, Yen-Chih Chen, Chao-Chuan Wu, Li-Feng Liu, Yi-Fang Yang, Chung-Yu Yeh, Mei-Lang Kung, Ya-Ting Tu, and Kuo-Wang Tsai**

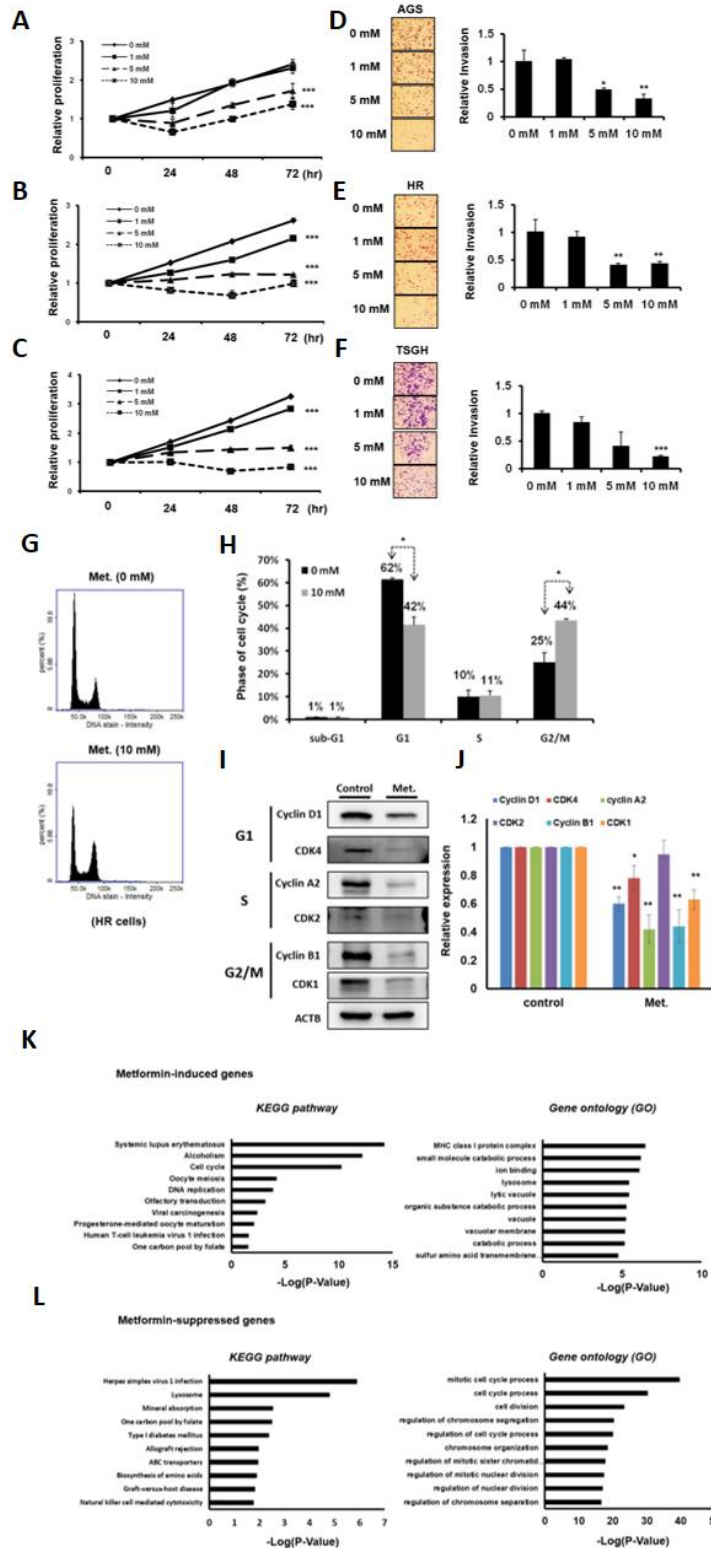

**Supplementary Figure 1. Metformin could inhibit gastric cancer cell proliferation and motility ability.** (A)–(C) AGS, HR, and TSGH were treated with various doses of metformin (0, 1, 5, and 10 mM). Next, cell proliferation was measured after 0, 24, 48, and 72 h. (D)–(F) Cell invasion ability was examined in

AGS, HR, and TSGH with various doses of metformin (left panel), and the relative invasion ability was quantified (right panels). (G) and (H) Cell cycle distributions of HR cells with and without metformin (10 mM) were analyzed and quantified through image flow cytometry. (I) and (J) Cell cycle-related genes were examined and quantified in HR with and without metformin through western blotting. (\* $p < .05$ , \*\* $p < .01$ , \*\*\* $p < .001$ ). (K) and (L) Metformin-induced and -suppressed genes were respectively subjected to Kyoto encyclopedia of genes and genomes (KEGG) and gene ontology (GO) pathway enrichment analysis.

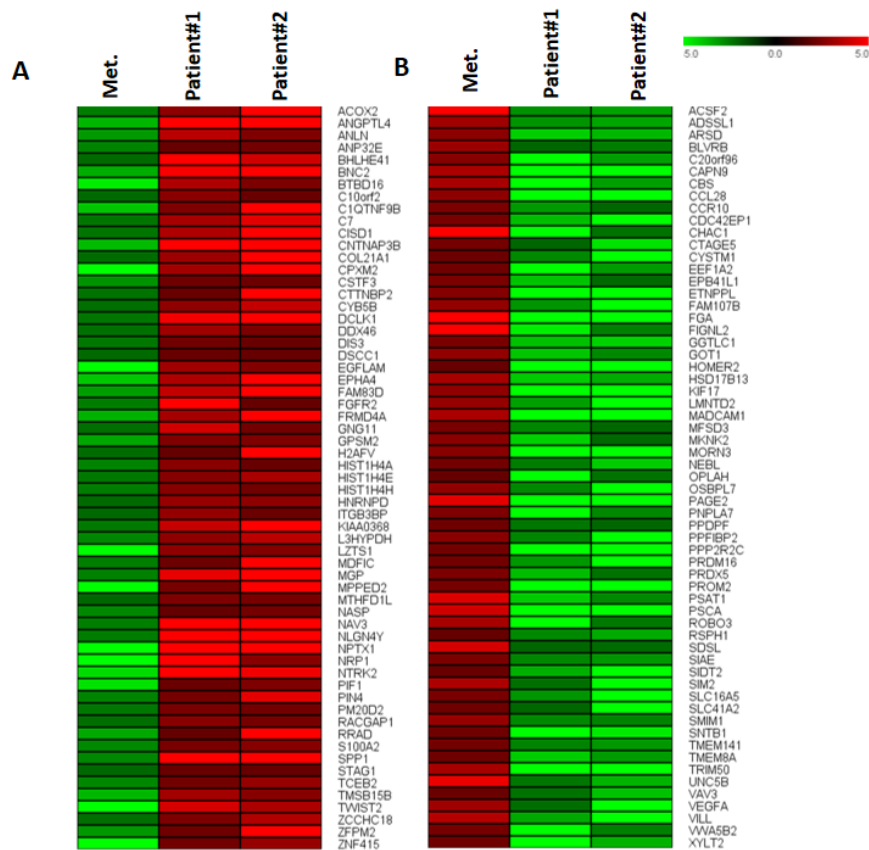

**Supplementary Figure 2. Metformin-regulated protein-coding genes in gastric cancer identified using the microarray approach**

By combining the transcriptome profiles of gastric cancer and the corresponding adjacent normal tissue from two patients with gastric cancer, we precisely identified metformin-associated protein-coding gene candidates in gastric cancer. (A) and (B) Putative oncogenic and tumor-suppressive protein-coding gene candidates for regulating expression in HR with metformin treatment and two gastric cancers.

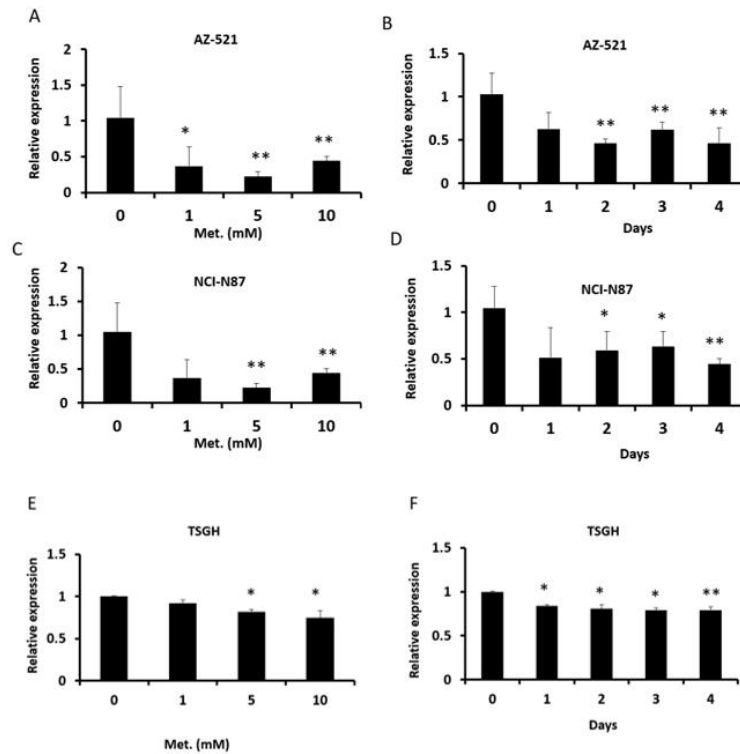

**Supplementary Figure 3. *Loc100506691* expression was suppressed by metformin treatment in gastric cancer cells.** (A)–(C) Expression levels of *Loc100506691* were examined using real-time PCR in AZ-521, NCI-N87, and TSGH cells following metformin treatment at various doses (0, 1, 5, and 10 mM) for 4 days. (D)–(E) Expression levels of *Loc100506691* were examined using real-time PCR in AZ-521, NCI-N87, and TSGH cells following metformin treatment (10 mM) at different durations (0, 1, 2, 3, and 4 days). (\* $p < .05$ , \*\* $p < .01$ , \*\*\* $p < .001$ ).

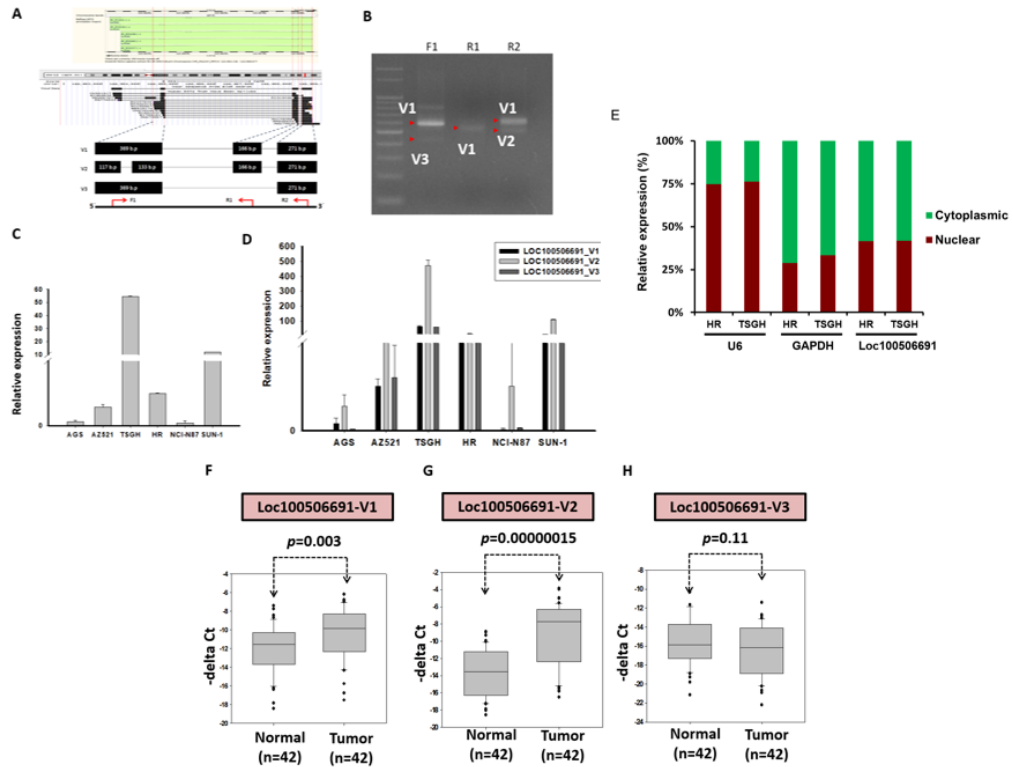

**Supplementary Figure 4. Expression levels of Loc100506691 isoforms in human gastric cancer cells and gastric cancer tissues.** (A) Locations of the Loc100506691 genes were determined by the UCSC Genome Browser of the human genome (upper panels). Expression sequence transcripts are presented in the lower panel. (B) Identification of the full length of Loc100506691 was performed by 5'- and 3'-RACE. (C) Expression levels of Loc100506691 were examined by employing the real-time PCR approach in human gastric cancer cells, namely AGS, AZ-521, HR, TSGH, NCI-N87, and SUN-1. (D) Expression levels of three isoforms were examined by performing real-time PCR in human gastric cancer cells. (E) The localization of Loc100506691 was evaluated in TSGH and HR cells. (F)–(H) Expression levels of three isoforms of Loc100506691 were examined in gastric cancer and compared with those of the corresponding adjacent normal tissue through real-time PCR.

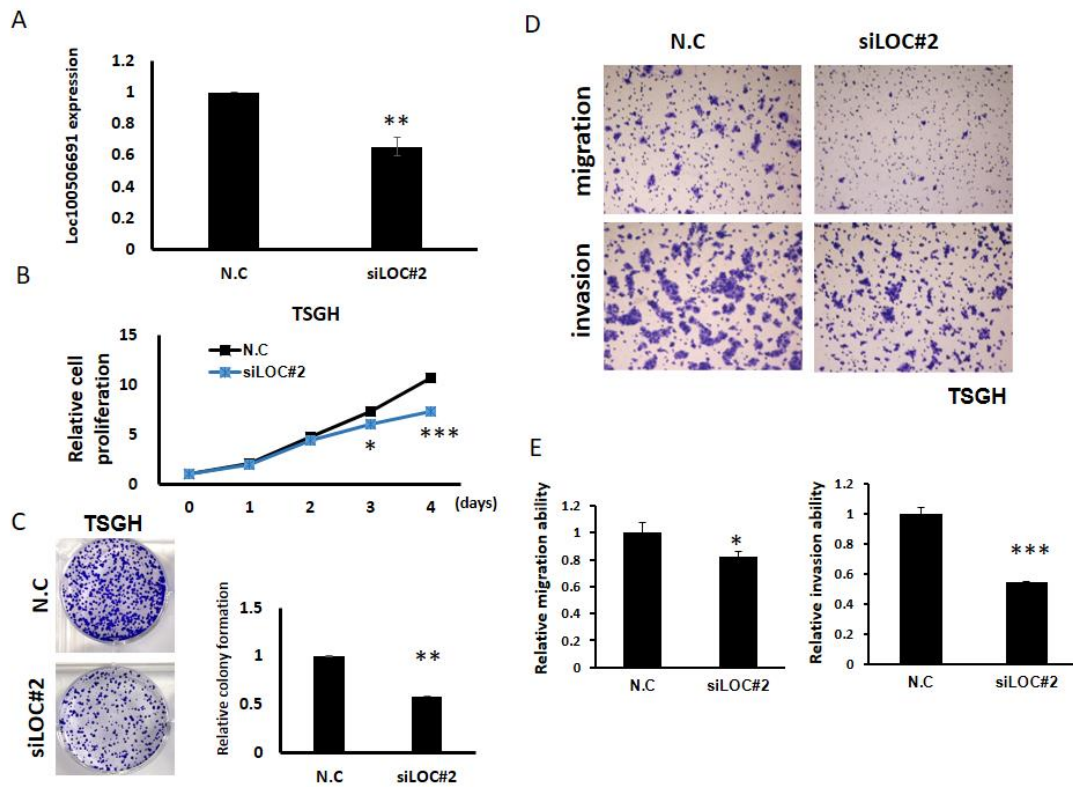

**Supplementary Figure 5. Loc100506691 knockdown suppressed gastric cancer cell growth and motility.** (A) and (B) Expression levels of Loc100506691 were examined in HR and TSGH after siLOC#2 transfection. (C)-(E) Cell proliferation, colony formation ability, migration and invasion ability were assessed in TSGH with siLOC#2 transfection. (\* $p < .05$ , \*\* $p < .01$ , \*\*\* $p < .001$ ).

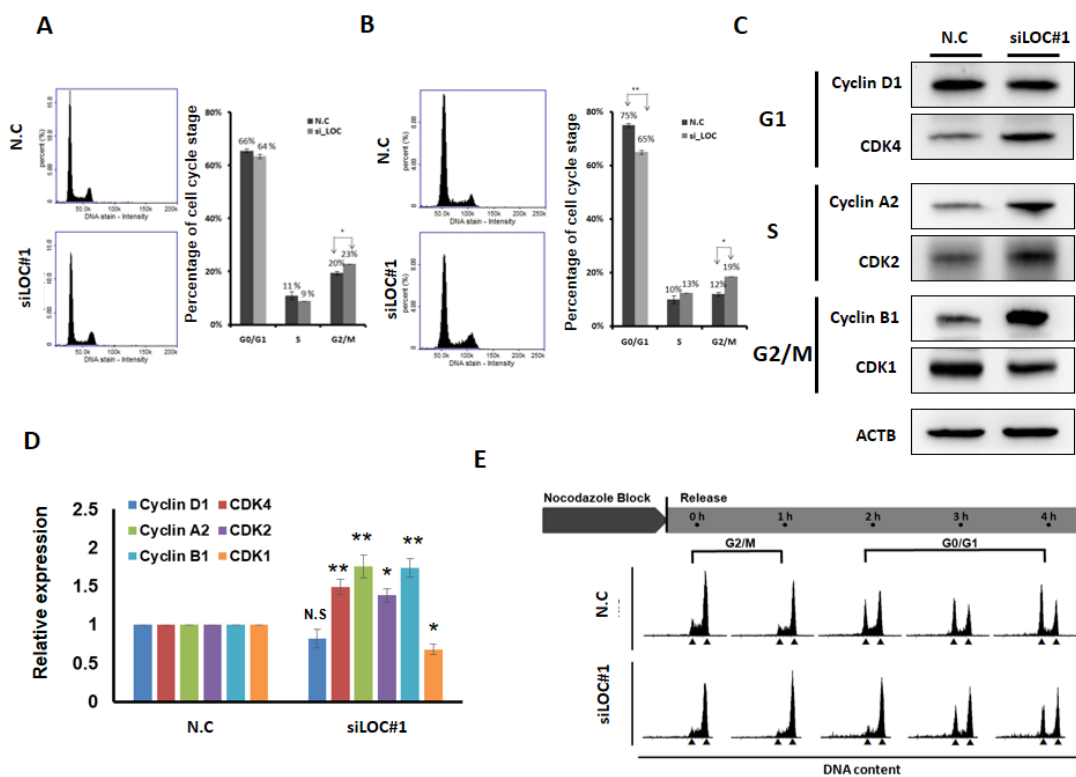

**Supplementary Figure 6. Knockdown of *Loc100506691* impaired gastric cancer cell growth by inducing cell cycle arrest in the G2/M phase (A) and (B) The cell cycle of HR and TSGH was examined following *Loc100506691* knockdown for 48 h. (C) and (D) Expression levels of cell cycle-related genes were examined and quantified using Western blotting. (E) The cell cycle of TSGH was synchronized using a nocodazole block for 14 h, and the cells were subsequently released and analyzed at 1, 2, 3, and 4 h. (\* $p < .05$ , \*\* $p < .01$ , \*\*\* $p < .001$ ).**



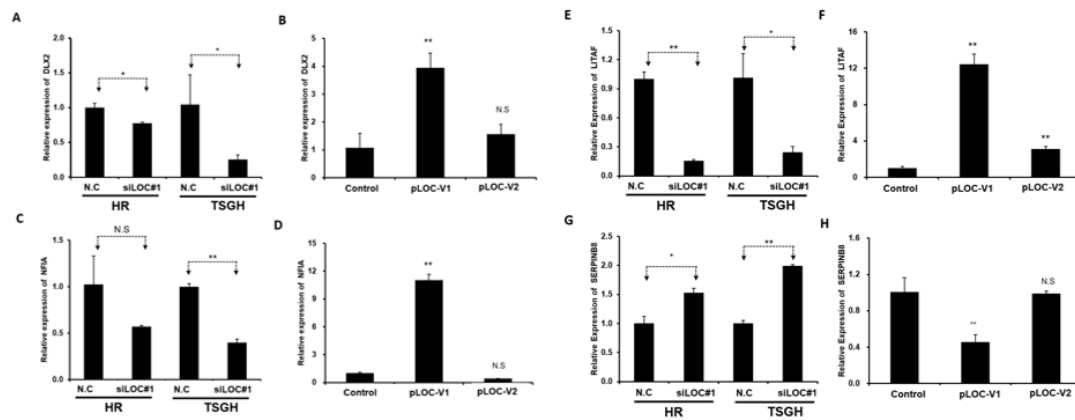

**Supplementary Figure 7. Identification of putative downstream genes of Loc100506691 in gastric cancer by adopting a microarray approach.** Expression levels of DLX2 (A), NF1A (C), LITAF (E), and SERPINB8 (G) were examined through real-time PCR in TSGH and HR cells with Loc100506691 knockdown. Expression levels of DLX2 (B), NF1A (D), LITAF (F), and SERPINB8 (H) were assessed in HR cells with pLoc100506691-V1 or-V2 overexpression by adopting the real-time PCR approach. (\* $p < .05$ , \*\* $p < .01$ , \*\*\* $p < .001$ ).

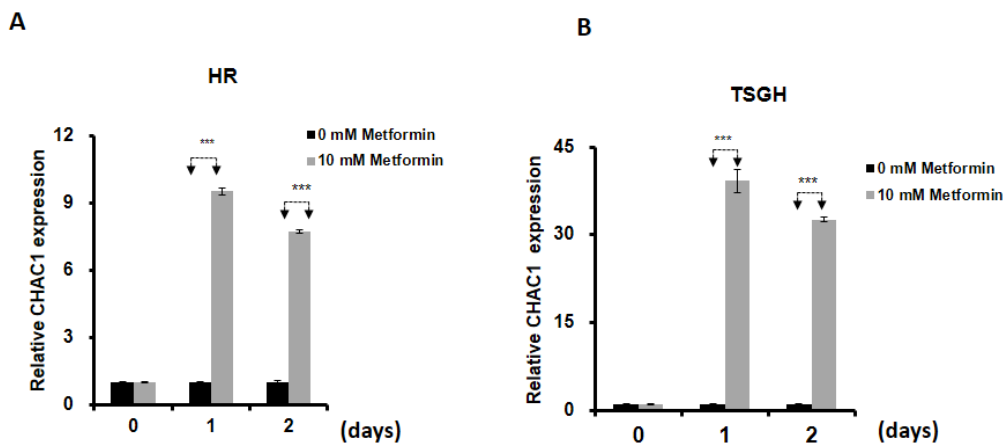

**Supplementary Figure 8. Expression levels of CHAC1 were upregulated in gastric cancer cells following metformin treatment (A) and (B) CHAC1 expression levels were assessed using real-time PCR in HR and TSGH following metformin treatment. (\* $p < .05$ , \*\* $p < .01$ , \*\*\* $p < .001$ ).**

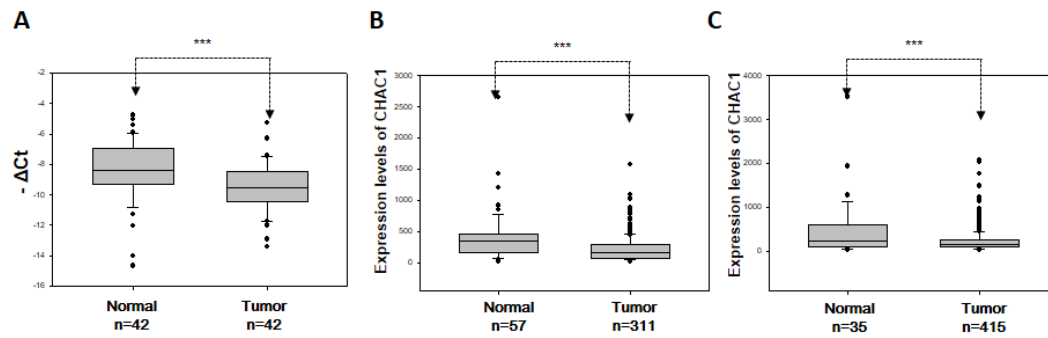

**Supplementary Figure 9. Expression levels of CHAC1 assessed in gastric cancer.**

(A) Expression levels of CHAC1 were examined through real-time PCR in gastric cancer and compared with those of the corresponding adjacent healthy tissue. (B) and (C) Expression levels of CHAC1 obtained from the TCGA and GENT databases were analyzed.

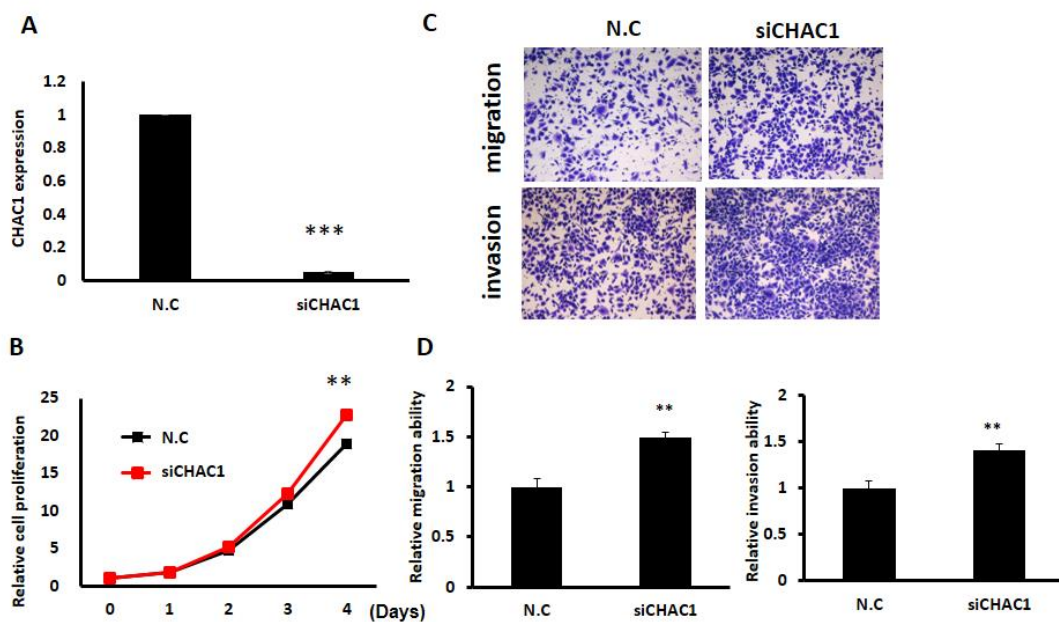

**Supplementary Figure 10. CHAC1 knockdown suppressed HR cell growth and motility.**

(A) CHAC1 expression levels were examined in HR after siCHAC1 transfection. (B)-(D) Cell proliferation, migration and invasion ability were assessed in HR with siCHAC1 transfection. (\* $p < .05$ , \*\* $p < .01$ , \*\*\* $p < .001$ ).

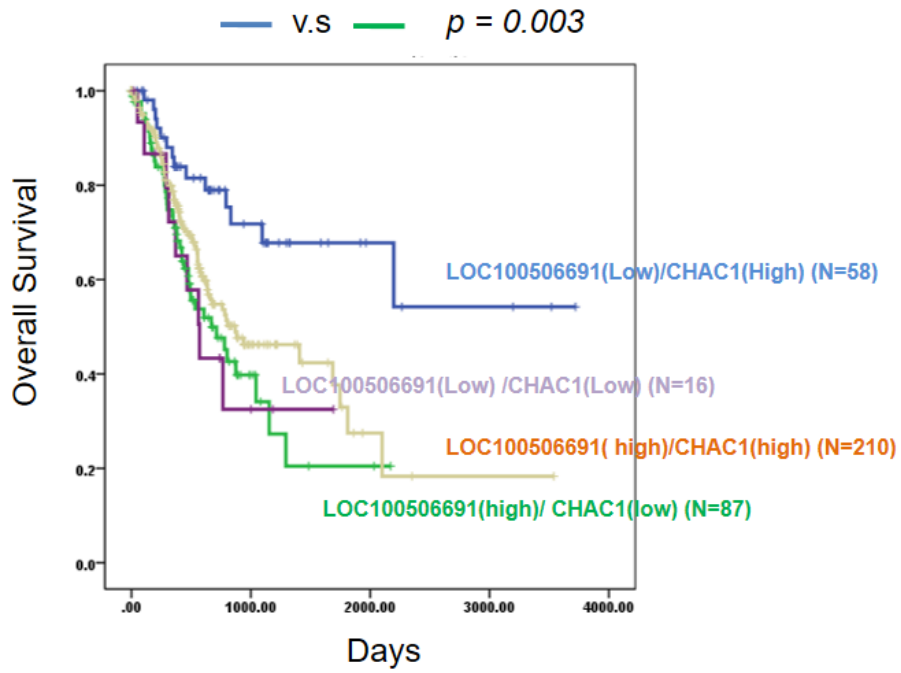

**Supplementary Figure 11.** The combination of high Loc100506691 and low CHAC1 expression levels was highly correlated with the poor survival curve of patients with gastric cancer. Patients with gastric cancer were separated into two groups representing high and low Loc100506691 or CHAC1 expression on the basis of best cutoff value (Loc100506691: 0.184 and CHAC1: 2.06).

**Supplementary Table 1. Correlation of Loc100506691 expression with clinicopathological characteristics of 360 patients with gastric cancer.**

| Variables               | Loc100506691 (n=360) |           |        |                    |
|-------------------------|----------------------|-----------|--------|--------------------|
|                         | No. (%)              | Mean±SD   | Median | p-value            |
| <b>Pathology stage</b>  |                      |           |        |                    |
| I                       | 54 (15.0)            | 0.82±1.14 | 0.36   | 0.893 <sup>a</sup> |
| II                      | 116 (32.2)           | 0.92±1.26 | 0.46   |                    |
| III                     | 151 (41.9)           | 0.86±0.99 | 0.55   |                    |
| IV                      | 39 (10.8)            | 0.79±0.78 | 0.54   |                    |
| <b>pT stage</b>         |                      |           |        |                    |
| T1                      | 19 (5.3)             | 0.77±0.93 | 0.45   | 0.274 <sup>a</sup> |
| T2                      | 77 (21.4)            | 0.76±1.07 | 0.35   |                    |
| T3                      | 165 (45.8)           | 0.82±0.99 | 0.52   |                    |
| T4                      | 99 (27.5)            | 1.04±1.25 | 0.72   |                    |
| <b>pN stage (n=357)</b> |                      |           |        |                    |
| N0                      | 114 (31.9)           | 1.03±1.39 | 0.53   | 0.658 <sup>b</sup> |
| N1                      | 94 (26.3)            | 0.83±0.99 | 0.45   |                    |
| N2                      | 75 (21.0)            | 0.83±0.93 | 0.52   |                    |
| N3                      | 74 (20.7)            | 0.70±0.75 | 0.51   |                    |
| <b>pM stage</b>         |                      |           |        |                    |
| M0                      | 335 (93.1)           | 0.86±1.10 | 0.49   | 0.800 <sup>c</sup> |
| M1                      | 25 (6.9)             | 0.92±0.87 | 0.55   |                    |

<sup>a</sup>p-value were estimated by one-way ANOVA test.

<sup>b</sup>p-values were estimated by Kruskal-Wallis I-way ANOVA test.

<sup>c</sup>p-value were estimated by student's T test.

**Supplementary Table 2. Univariate and multivariate Cox’s regression analyses of  
**Loc100506691** expression for overall survival of patients with gastric cancer.**

| Characteristic      | No. (%)    | OS               |         |                  |         |
|---------------------|------------|------------------|---------|------------------|---------|
|                     |            | CHR (95% CI)     | P-value | AHR (95% CI)     | P-value |
| <b>Loc100506691</b> | (n=)       |                  |         |                  |         |
| Low                 | 71 (19.9)  | 1.00             |         | 1.00             |         |
| High                | 285 (80.1) | 1.82 (1.15-2.88) | 0.011   | 1.86 (1.17-2.95) | 0.009   |

*Abbreviation: OS, Overall survival; CHR, crude hazard ratio; AHR, adjusted hazard ratio*

AHR were adjusted for AJCC pathological stage (II,III and IV VS. I).

**Supplementary Table 3. The sequence of three isoforms of Loc100506691 was examined by Sanger sequencing.**

| Isoforms      | Sequence                                                                                                                                                                                                                                                                                                                                                                                                                                                                                                                                                                                                                                                                                                                                                                                                                                                                           |
|---------------|------------------------------------------------------------------------------------------------------------------------------------------------------------------------------------------------------------------------------------------------------------------------------------------------------------------------------------------------------------------------------------------------------------------------------------------------------------------------------------------------------------------------------------------------------------------------------------------------------------------------------------------------------------------------------------------------------------------------------------------------------------------------------------------------------------------------------------------------------------------------------------|
| V1<br>(806bp) | 5-<br>AAAGAATTCTGCTGGAGCATCTGGAGTTGCTCAAATGGAGTGGCTGTGGCCATCTTTCCTTACACGTGGGGAGGAATCAGCCTGAGAATGAAACCATCAC<br>AGGAAAGGGCTGAAAGACGGTGAGTGTGTGCTTTCTAAGGGCAGCATTTGGGCCTTGGCCCCAGCCGGCCCTGAAGCCAGCACAAACCCCGGAACGTC<br>TCAATTTGTGAGCCAATAAATGCCCTTGATGGTTTAGGCAAGTTTTCGCTGGGTCTTACCCGACGTGAGCCCCACTCCTCCATATGGACCTGTTTTGGACC<br>AATGAGGCATCCCCTTCTGTAGTCCTCAACACGCGGAGCTCCACCACTCCTGAGCAGTGTGACCTCAGGTGTGACCTCAGGTGCTTGTGTCAGAGGCATC<br>GGGGGTCTCTGGCCAGAGGTGACATCTGAAGCAATCGGGATCCTGTTTGGTTTTGCCACATCCGACCTGCCGCCAGCTGGGGCAAGACAGCCACGCGC<br>GGCGGATGCACCGGCCCTGAACTCTTCTCGAGTAGTCCCCAGAGATTTAGGAAGAGAGAGAAGAGGTAAAGAGACCAGAAACAAAGTTTTTTGCAA<br>GCAAAGAACTGCAACAGGCCCCAGCTGTTAGGTTTGGGGGCGTATGGGGCAGGCGACTGAACTGCAGAGTTGGAGCCAGAGGTACCATTGCTGACCC<br>CTGAGCCCAGGAGCCTTGAGAATACTGACAGTGTTAATAATAACTGCAATCATCCAACATATGATGCTAGAATAACTGGACATCTGTGTGCAAAAATATTTAA<br>CCTATACCTTGCACCTT-3 |
| V2<br>(685bp) | AAGAATTCTGCTGGAGCATCTGGAGTTGCTCAAATGGAGTGGCTGTGGCCATCTTTCCTTACACGTGGGGAGGAATCAGCCTGAGAATGAAACCATCACA<br>GGAAAGGGCTGAAGACGGCAAGTTTTCACTGGGTCTTACCCGACGTGAGCCCCACTCCTCCATATGGACCTGTTTTGGACCAATGAGGCATCCTCTTCT<br>GTAGTCCTCAACACGCGGAGCTCCACCACTCCTGAGCAGTGTGACCTCAGGTGCTTGTGTCAGAGGCATCGGGGGTCTCTGGCCAGAGGTGACATCTGA<br>AGCAATCGGGATCCTGTTTGGTTTTGCCACATCCGACCTGCCGCCAGCTGGGGCAAGACAGCCACGCGCGGGGATGCACCGGCCCTGAACTCTTCTC<br>GAGTAGTCCCCAGAGATTTAGGAAGAGAGAGAAGAGGTAAAGAGACCAGAAACAAAGTCTTCTGCAAGCAAAGAACTGCAACAGGCCCCAGCTGTTA<br>GGTTTGGAGGGGCGTATGGGGCAGGCGACTGAACTGCAGAGTTGGAGCCAGAGGTACCATTGCTGACCCCTGAGCCCAGGAGCCTTGAGAATACTGACA<br>GTGTTAATAATAACTGCAATCATCCAACATATGATGCTAGAATAACTGGACATCTGTGTGCAAAAATATTTAAACCTATACCTTGCA CCTT                                                                                                                                                |
| V3<br>(640bp) | AAGAATTCTGCTGGAGCATCTGGAGTTGCTCAAATGGAGTGGCTGTGGCCATCTTTCCTTACACGTGGGGAGGAATCAGCCTGAGAATGAAACCATCACA<br>GGAAAGGGCTGAAGACGGTGAGTGTGTGCTTTCTAAGGGCAGCATTTGGGCCTTGGCCCCAGCCGGCCCTGAAGCCAGCACAAACCCCGGAACGTCT<br>CAATTTGTGAGCCAATAAATGCCCTTGATGGTTTAGGCAAGTTTTCACTGGGTCTTACCCGACGTGAGCCCCACTCCTCCATATGGACCTGTTTTGGACCA<br>ATGAGGCATCCTCTTCTGTAGTCCTCAACACGCGGAGCTCCACCACTCCTGAGCAGTGTGACCTCAGATTTAGGAAGAGAGAGAAGAGGTAAAGAGAC<br>CAGAAgCAAAGTCTTCTGCAAGCAAAGAACTGCAACAGGCCCCAGCTGTTAGGTTTGGGGGCGTATGGGGCAGGCGACTGAACTGCAGAGTTGGAGC<br>CAGAGGTACCATTGCTGACCCCTGAGCCCAGGAGCCTTGAGAATACTGACAGTGTTAATAATAACTGCAATCATCCAACATATGATGCTAGAATAACTGGAC<br>ATCTGTGTGCAAAAATATTTAAACCTATACCTTGCACCTT                                                                                                                                                                                                |

**Supplementary Table 4. Univariate and multivariate Cox's regression analyses of Loc100506691 and CHAC1 expression for overall survival of patients with gastric cancer.**

| Characteristic                | No. (%)    | OS               |         |                  |         |
|-------------------------------|------------|------------------|---------|------------------|---------|
|                               |            | CHR (95% CI)     | P-value | AHR (95% CI)     | P-value |
| (n=371)                       |            |                  |         |                  |         |
| LOC100506691 low , CHAC1 high | 58 (15.6)  | 1.00             |         | 1.00             |         |
| LOC100506691 high, CHAC1 low  | 87 (23.5)  | 1.48 (1.04-2.11) | 0.031   | 1.49 (1.04-2.13) | 0.029   |
| LOC100506691 high, CHAC1 high | 210 (56.6) | 1.08 (0.78-1.49) | 0.648   | 1.10 (0.79-1.52) | 0.586   |
| LOC100506691 low , CHAC1 low  | 16 (4.3)   | 1.44 (0.73-2.83) | 0.288   | 1.33 (0.67-2.61) | 0.417   |

*Abbreviation: OS, Overall survival; CHR, crude hazard ratio; AHR, adjusted hazard ratio*  
AHR were adjusted for AJCC pathological stage (II,III and IV VS. I).

**Supplementary Table 5. The Primers used in this study of qPCR**

| <b>Primer</b>   | <b>5'~3'</b>                                  |
|-----------------|-----------------------------------------------|
| GAPDH-F         | TGCACCACCAACTGCTTAGC                          |
| GAPDH-R         | GGCATGGACTGTGGTCATGAG                         |
| Loc100506691-F1 | GTCCCCAGAGATTCAGGAAGAG                        |
| Loc100506691-F2 | TGAGCCAATAAATGCCCTTG                          |
| Loc100506691-F3 | GAAAGGGCTGAAAGACGGCA                          |
| Loc100506691-R1 | CCATACGCCCTCAAACCTAA                          |
| Loc100506691-R2 | ACAGGATCCCGATTGCTTCA                          |
| Loc100506691-R3 | TCTCTTTCCTGAAATCTGAG                          |
| H19-F           | ATC GGT GCC TCA GCG TTC GG                    |
| H19-R           | CTG TCC TCG CCG TCA CAC CG                    |
| RBMS3-AS3-F     | GAGCAAACAACCTGCATATGGCT                       |
| RBMS3-AS3-R     | TGGCATTGGAGACTATTGTGTT                        |
| CHAC1-F         | GTGTGGTGACGCTCCTTGAA                          |
| CHAC1-R         | TGGTATCGTAGCCACCAAGC                          |
| DLX2-F          | CCTTACTCCGCCAAGAGCAG                          |
| DLX2-R          | TCCTCCTTCTCAGGCTCGTT                          |
| NF1A-F          | ACAGGACCCAGAGCAAGTCC                          |
| NF1A-R          | CAACATTGGGGTGGGAAGGA                          |
| LITAF-F         | CCATCCGCACCTCCATCCTA                          |
| LITAF-R         | TGGATAGGGCGGTCCAAAAA                          |
| SERPINB8-F      | TATTCACCGAGGTTTCCAGTCA                        |
| SERPINB8-R      | TCCAGCTCTGCCTGATAGAAC                         |
| U6-F            | CTCGCTTCGGCAGCACA                             |
| U6-R            | AACGCTTCACGAATTTGCGT                          |
| miR-26a-5p-RT   | CTCAACTGGTGTTCGTGGAGTCGGCAATTCAGTTGAGAGCCTATC |
| miR-330-5p-RT   | CTCAACTGGTGTTCGTGGAGTCGGCAATTCAGTTGAGGCCTAAGA |



|                |                          |
|----------------|--------------------------|
| miR-26a-5p-GSF | CGGCGGTTC AAGTAATCCAGGA  |
| miR-330-5p-GSF | CGGCGGTCTCTGGGCCTGTGTC   |
| Universal-R    | CTGGTGTCGTGGAGTCGGCAATTC |
